# Supplementary material for: Thermodynamic Assessment of Triclocarban Dissolution Process in N-Methyl-2-pyrrolidone + Water Cosolvent Mixtures
Source: MDPI journal article supplement (doi:10.3390/molecules28207216), 2023-10-22
Supplement: s1 [file s1]

## Calibration curve of Triclocarban

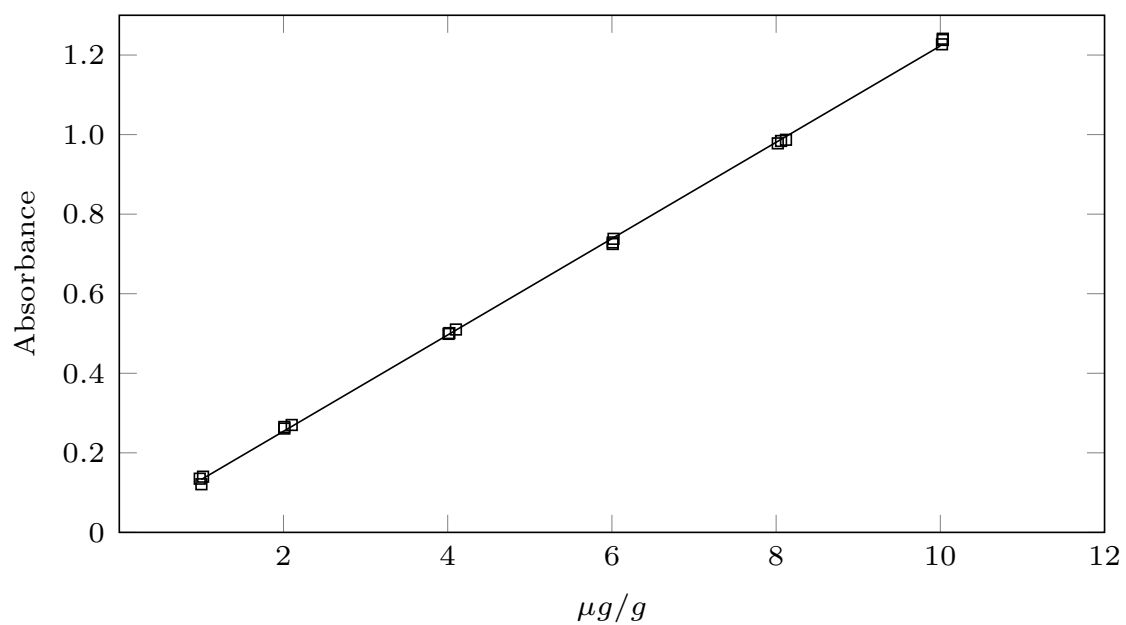

Figure S1: Calibration curve of triclocarban in absolute ethanol obtained at a wavelength of 265 nm.

Calibration curve equation

$$C = 8,255A - 0,0986 \quad (S1)$$

where C is concentration in  $\mu g/g$  and A is an absorbance

|                                  |             |
|----------------------------------|-------------|
| Multiple R.                      | 0.999793856 |
| R squared.                       | 0.999587755 |
| Adjusted R square                | 0.999561989 |
| Standard Error of the regression | 0.008329394 |
| Observations                     | 18          |

Table S1: Regression statistics

|            | Degrees of freedom | Sum of Squares | Mean squared error | F           | Significance F |
|------------|--------------------|----------------|--------------------|-------------|----------------|
| Regression | 1                  | 2.691610217    | 2.691610217        | 38795.85348 | 1.63841E-28    |
| Residual   | 16                 | 0.001110061    | 6.93788E-05        |             |                |
| Total      | 17                 | 2.692720278    |                    |             |                |
|            | Coefficients       | Standard Error | t Stat             | p-value     |                |
| Intercept  | 0.0117494          | 0.0037524      | 3.1311779          | 0.0064447   |                |
| slope      | 0.1211314          | 0.0006150      | 196.96663          | 1.63841E-28 |                |

Table S2: ANOVA
